# Supplementary material
Source: PubMed Central journal article supplement (PMC5528754)
Supplement: MOL2-9-1186-s001.pdf [file MOL2-9-1186-s001.pdf]

**Supplemental table 1.** Displaying the telomere length data, together with the clinical/laboratory characteristics for each patient with Invasive Ductal carcinoma.

| Sample number | Age at Operation | Percent Tumor | pTNM      | NPI Score | Breast Grade | ER       | PGR      | HER2     | Alive | OS   | Telomere length |
|---------------|------------------|---------------|-----------|-----------|--------------|----------|----------|----------|-------|------|-----------------|
| 1             | 84               | 81-100%       |           | 0         | III          | Negative |          |          | 1     | 233  | 1.07            |
| 2             | 75               | 81-100%       | T2 N3a Mx | 6.82      | III          | Negative | Negative | positive | 1     | 852  | 1.29            |
| 3             | 68               | 81-100%       | T1c No Mx | 4.36      | III          | positive |          | negative | 0     | 1423 | 1.66            |
| 4             | 82               | 81-100%       | T2 No Mx  | 0         | II           | positive |          |          | 1     | 241  | 1.78            |
| 5             | 69               | 81-100%       |           | 0         | II           |          |          |          | 1     | 396  | 1.82            |
| 6             | 43               | 81-100%       | T2 N2a Mx | 6.46      | III          | Negative | Negative | negative | 1     | 1760 | 1.84            |
| 7             | 72               | 81-100%       | T2 N1 Mx  | 0         | III          | positive | Negative | negative | 1     | 300  | 2.02            |
| 8             | 79               | 81-100%       | T2N1miMx  | 5.42      | III          | Negative | Negative | positive | 1     | 241  | 2.18            |
| 9             | 61               | 81-100%       | T1 No Mx  | 0         | II           | positive |          |          | 0     | 2467 | 2.29            |
| 10            | 73               | 81-100%       | T2N1Mx    | 5.84      | III          | Negative | Negative | negative | 0     | 985  | 2.33            |
| 11            | 59               | 81-100%       |           | 0         | II           | positive | positive | negative | 0     | 1564 | 2.46            |
| 12            | 75               | 81-100%       | T2 N1 Mx  | 0         | III          | positive |          |          | 1     | 2015 | 2.51            |
| 13            | 79               | 81-100%       | T1 No     | 0         | I            | positive |          | negative | 0     | 1766 | 2.52            |
| 14            | 45               | 81-100%       | T2N1aMx   | 4.8       | II           | positive | positive | negative | 0     | 1997 | 2.62            |
| 15            | 59               | 81-100%       | T2N0Mx    | 4.44      | III          | positive | positive | negative | 0     | 1477 | 2.66            |
| 16            | 73               | 81-100%       | T2N0MX    | 4.72      | III          | Negative | Negative | positive | 0     | 1265 | 2.67            |
| 17            | 48               | 21-40%        | T1 No Mx  | 0         | III          | Negative | Negative | negative | 0     | 2305 | 2.68            |
| 18            | 63               | 81-100%       | T1c No Mx | 3.28      | II           | positive |          | negative | 0     | 2006 | 2.69            |
| 19            | 34               | 81-100%       | T2 No Mx  | 0         | III          | Negative | positive |          | 0     | 2388 | 2.70            |
| 20            | 65               | 61-80%        |           | 0         | II           | positive |          | negative | 0     | 1570 | 2.70            |
| 21            | 65               | 81-100%       | T1c No Mx | 4.36      | III          | Negative | positive | negative | 0     | 1973 | 2.73            |
| 22            | 56               | 81-100%       | T2 No Mx  | 0         | II           | positive |          |          | 0     | 2407 | 2.73            |
| 23            | 53               | 41-60%        | T2mN1Mx   | 4.54      | II           | positive |          | negative | 0     | 1128 | 2.79            |
| 24            | 58               | 81-100%       | T2 No Mx  | 0         | III          | positive | Negative | negative | 0     | 2271 | 2.80            |
| 25            | 58               | 81-100%       | T2 No Mx  | 0         | III          | Negative | Negative | positive | 0     | 2264 | 2.92            |
| 26            | 83               | 61-80%        | T1cNoMx   | 2.4       | I            | positive |          |          | 0     | 2142 | 2.95            |
| 27            | 38               | 81-100%       |           | 4.3       | III          | positive |          | positive | 0     | 2179 | 2.98            |
| 28            | 74               | 81-100%       | T1cNoMx   | 3.34      | II           | positive |          |          | 0     | 2109 | 3.04            |
| 29            | 75               | 81-100%       | t1n0mx    | 0         | II           | positive | positive | negative | 0     | 1493 | 3.04            |
| 30            | 73               | 81-100%       | T2 N1 Mx  | 0         | II           | Negative | Negative |          | 0     | 2306 | 3.12            |
| 31            | 47               | 81-100%       | T2N0Mx    | 3.4       | II           | positive |          | negative | 0     | 1442 | 3.15            |
| 32            | 86               | 81-100%       |           | 0         | II           | positive |          |          | 0     | 2432 | 3.16            |
| 33            | 81               | 41-60%        | T2NoMx    | 2.6       | I            | positive | positive | negative | 0     | 646  | 3.22            |
| 34            | 42               | 81-100%       | T1c No Mx | 2.24      | I            | positive |          |          | 0     | 1977 | 3.26            |
| 35            | 39               | 81-100%       | T2N0Mx    | 4.6       | III          | Negative | Negative | negative | 0     | 2148 | 3.26            |
| 36            | 45               | 81-100%       | T2 N1     | 0         | II           | positive |          | negative | 0     | 2060 | 3.26            |
| 37            | 50               | 41-60%        | T1cNoMx   | 3.28      | II           | positive |          | negative | 0     | 1295 | 3.35            |
| 38            | 42               | 81-100%       | T2N3aMx   | 6.46      | III          | Negative | Negative | positive | 0     | 1329 | 3.37            |
| 39            | 66               | 81-100%       | T1c N1 Mx | 5.26      | III          | positive | positive | negative | 0     | 2022 | 3.43            |
| 40            | 78               |               | T2 N1 Mx  | 5.48      | III          | positive |          |          | 0     | 1927 | 3.45            |
| 41            | 47               | 81-100%       | T2 N1m Mx | 5.6       | III          | positive |          | negative | 0     | 1917 | 3.50            |
| 42            | 65               | 21-40%        | T2N1aMx   | 3.56      | I            | positive |          | negative | 0     | 1408 | 3.52            |
| 43            | 73               | 61-80%        | T2 No Mx  | 3.56      | II           | Negative | Negative | negative | 0     | 2077 | 3.54            |
| 44            | 58               | 81-100%       | T3 N1 Mx  | 5.02      | II           | positive | positive | negative | 0     | 2228 | 3.55            |
| 45            | 59               | 81-100%       | T2 No Mx  | 0         | III          | positive | Negative | negative | 0     | 2141 | 3.58            |
| 46            | 79               | 81-100%       | T2N0Mx    | 4.66      | III          | positive |          | positive | 0     | 1492 | 3.60            |
| 47            | 69               | 81-100%       | T1c No Mx | 4.34      | III          | Negative |          | positive | 0     | 1922 | 3.70            |
| 48            | 61               | 81-100%       | T3N1miMx  | 5.08      | II           | positive |          | negative | 0     | 1231 | 3.70            |
| 49            | 68               | 81-100%       | T2 N1a Mx | 5.46      | III          | positive | positive | negative | 0     | 2137 | 3.72            |
| 50            | 36               | 41-60%        |           | 0         | II           | positive | Negative | positive | 0     | 1749 | 3.72            |
| 51            | 60               | 81-100%       | T2 N12 Mx | 4.54      | II           | positive | positive | negative | 0     | 2268 | 3.75            |
| 52            | 69               | 61-80%        |           | 0         | II           | positive | positive | negative | 0     | 1935 | 3.76            |
| 53            | 45               | 61-80%        | T1c No Mo | 2.28      | I            | positive | positive | negative | 0     | 2233 | 3.78            |
| 54            | 68               | 81-100%       | T2aNoMx   | 3.44      | II           | positive | positive | negative | 0     | 1563 | 3.81            |
| 55            | 52               | 81-100%       |           | 0         | III          | positive | positive | negative | 1     | 1754 | 3.82            |
| 56            | 49               | 81-100%       | T2N1miMx  | 5.52      | III          | positive |          | negative | 0     | 1414 | 3.83            |
| 57            | 46               | 81-100%       | pT2 No Mx | 4.6       | III          | Negative | Negative | negative | 0     | 2221 | 3.83            |
| 58            | 70               | 81-100%       | T4bNoMx   | 3.28      | II           | positive | positive | negative | 0     | 1479 | 3.89            |
| 59            | 83               | 81-100%       | T2N0MX    | 0         | III          | positive | positive | positive | 0     | 723  | 3.96            |
| 60            | 55               | 81-100%       | T1cN0Mx   | 4.36      | III          | positive | positive | negative | 0     | 896  | 3.98            |
| 61            | 48               | 81-100%       | t2n0mx    | 0         | III          | positive | Negative | positive | 0     | 721  | 3.99            |
| 62            | 68               | 61-80%        |           | 0         | III          | positive | positive | negative | 1     | 766  | 4.02            |
| 63            | 87               | 81-100%       | T2NoMx    | 4.66      | III          | positive | Negative | positive | 0     | 2157 | 4.06            |
| 64            | 70               | 81-100%       | T1cN0Mx   | 3.3       | II           | positive | positive | negative | 0     | 1362 | 4.08            |
| 65            | 70               | 81-100%       | T2 No Mx  | 4.42      | III          | positive | Negative | negative | 0     | 1948 | 4.08            |
| 66            | 53               | 81-100%       | T2 N1 Mx  | 0         | II           | positive |          | negative | 0     | 1725 | 4.09            |
| 67            | 46               | 81-100%       | T2NoMx    | 3.96      | I            | positive | positive | negative | 0     | 1436 | 4.10            |
| 68            | 58               | 81-100%       | T2 N1a Mx | 4.44      | II           | positive |          | negative | 0     | 2282 | 4.11            |
| 69            | 71               | 81-100%       | T2 No Mx  | 4.44      | III          | Negative | Negative | positive | 0     | 2313 | 4.11            |
| 70            | 51               | 81-100%       | T2 N2 Mx  | 0         | III          | positive |          | positive | 1     | 195  | 4.12            |
| 71            | 48               | 41-60%        | T2N0Mx    | 4.44      | III          | positive | positive | negative | 0     | 1142 | 4.12            |
| 72            | 80               | 81-100%       |           | 0         | I            | positive | positive | negative | 1     | 1792 | 4.15            |
| 73            | 49               | 81-100%       | T2 No Mx  | 0         | I            | positive |          | negative | 0     | 2436 | 4.16            |
| 74            | 56               | 81-100%       | T1N0MX    | 0         | II           | positive | Negative | positive | 0     | 1048 | 4.17            |
| 75            | 47               | 81-100%       | T2N2aMx   | 5.98      | II           | positive | positive | negative | 0     | 1508 | 4.20            |
| 76            | 61               | 81-100%       | T1cN1aMx  | 4.24      | II           | positive | positive | negative | 0     | 1638 | 4.22            |
| 77            | 76               | 61-80%        | T2mN3aMx  | 6.8       | III          | positive | positive | negative | 0     | 1502 | 4.22            |
| 78            | 33               | 81-100%       | T2N1Mx    | 5.76      | III          | Negative | Negative | negative | 0     | 1523 | 4.23            |
| 79            | 67               | 81-100%       | T2 N1 Mx  | 0         | II           | positive |          | negative | 0     | 2173 | 4.29            |
| 80            | 48               | 81-100%       |           | 0         | III          | Negative |          | positive | 1     | 854  | 4.38            |
| 81            | 58               | 81-100%       | T1 No     | 0         | II           | positive |          | positive | 0     | 1907 | 4.46            |
| 82            | 65               | 81-100%       | T2N0Mx    | 4.44      | III          | Negative | Negative | negative | 0     | 1442 | 4.50            |
| 83            | 86               | 41-60%        |           | 0         | II           | positive | positive | negative | 0     | 1625 | 4.55            |
| 84            | 40               | 81-100%       | T1 No Mx  | 0         | II           | positive | positive | negative | 0     | 2271 | 4.63            |
| 85            | 54               | 81-100%       | T1c No Mx | 4.32      | III          | Negative | Negative | negative | 0     | 2232 | 4.66            |
| 86            | 42               | 61-80%        | T3N0MX    | 0         | III          | Negative | Negative | negative | 1     | 1000 | 4.66            |
| 87            | 49               | 61-80%        | T2 No Mx  | 3.44      | II           | positive |          | negative | 0     | 1527 | 4.69            |
| 88            | 60               | 81-100%       | T2N1aMx   | 5.62      | III          | Negative | Negative | negative | 0     | 1440 | 4.70            |

|     |    |         |           |      |     |            |            |          |   |      |      |
|-----|----|---------|-----------|------|-----|------------|------------|----------|---|------|------|
| 89  | 48 | 81-100% | T2N1aMx   | 4.6  | II  | positive   | positive   | negative | 0 | 1589 | 4.70 |
| 90  | 48 | 81-100% | T1 N1 Mo  | 5.34 | III | positive   | positive   | negative | 0 | 2286 | 4.87 |
| 91  | 50 | 81-100% | T2N1Mx    | 5.66 | III | positive   | positive   | negative | 1 | 546  | 4.87 |
| 92  | 70 | 81-100% | T1 No Mx  | 0    | II  | positive   | positive   | negative | 0 | 2095 | 4.89 |
| 93  | 46 | 81-100% | T2N0MX    | 0    | III | positive   | positive   | positive | 0 | 1085 | 4.89 |
| 94  | 53 | 41-60%  | T2        | 0    | III | positive   | Negative   | positive | 0 | 1858 | 4.90 |
| 95  | 72 | 41-60%  | Unknown   | 0    | II  | positive   | positive   | negative | 0 | 1935 | 4.93 |
| 96  | 60 | 81-100% | T2NoMx    | 3.44 | II  | positive   |            |          | 0 | 1274 | 4.99 |
| 97  | 65 | 81-100% | T1cN0Mx   | 3.24 | II  | positive   |            | negative | 0 | 1439 | 5.14 |
| 98  | 69 | 81-100% |           | 0    | II  | positive   | positive   | negative | 0 | 2131 | 5.15 |
| 99  | 43 | 81-100% | t2n1m0    | 0    | III | positive   | positive   | positive | 0 | 1281 | 5.15 |
| 100 | 87 | 81-100% | T2NoMx    | 2.44 | I   | positive   | positive   | negative | 0 | 1866 | 5.20 |
| 101 | 70 | 81-100% | T2N0Mx    | 4.82 | III | Negative   | Negative   | negative | 1 | 412  | 5.30 |
| 102 | 43 | 81-100% |           | 0    | II  | positive   | positive   | negative | 0 | 1913 | 5.35 |
| 103 | 76 | 61-80%  | T2 N3a Mx | 6.64 | III | positive   | Negative   | negative | 1 | 1233 | 5.42 |
| 104 | 42 | 81-100% | T1N0Mx    | 3.26 | II  | positive   |            | positive | 0 | 1561 | 5.46 |
| 105 | 66 | 81-100% |           | 0    | II  | positive   |            | negative | 0 | 1884 | 5.48 |
| 106 | 84 | 81-100% | T1c No Mx | 3.4  | II  | positive   |            |          | 0 | 2113 | 5.52 |
| 107 | 42 | 81-100% | T2N1biMO  | 0    | III | positive   | positive   | positive | 0 | 959  | 5.58 |
| 108 | 73 | 81-100% | T2N0Mx    | 4.28 | III | positive   |            | negative | 0 | 1307 | 5.60 |
| 109 | 44 | 81-100% | T1cN1biMX | 0    | III | positive   | Negative   | positive | 0 | 1071 | 5.64 |
| 110 | 66 | 81-100% | T2 N1 Mx  | 5.7  | III | Borderline | Borderline | positive | 0 | 1885 | 5.74 |
| 111 | 49 |         | T2 N1 Mx  | 6    | III | Negative   | Negative   | negative | 0 | 1921 | 5.75 |
| 112 | 52 | 81-100% | T2N3aMx   | 6.58 | III | positive   |            | negative | 0 | 1328 | 5.80 |
| 113 | 68 | 0-20%   |           | 0    | II  | positive   | positive   | negative | 0 | 2122 | 5.81 |
| 114 | 71 | 81-100% | T2 N1 Mx  | 0    | II  | Negative   | Negative   | negative | 1 | 719  | 5.85 |
| 115 | 75 | 81-100% |           | 0    | III | positive   | Negative   | positive | 1 | 678  | 6.13 |
| 116 | 78 | 81-100% | T4bNoMx   | 4.5  | III | positive   | Borderline | negative | 0 | 1344 | 7.04 |
| 117 | 45 | 81-100% | T3N2Mx    | 0    | III | Negative   | Negative   | positive | 0 | 991  | 7.05 |
| 118 | 67 | 41-60%  | Unknown   | 0    | I   | positive   | positive   | negative | 0 | 1507 | 7.27 |
| 119 | 47 | 61-80%  | T1 No Mx  | 0    | III | Negative   | Negative   | negative | 0 | 2145 | 8.46 |
| 120 | 55 | 81-100% | T2 No Mx  | 4.44 | III | Negative   | Negative   | positive | 0 | 2058 | 9.97 |
